# Supplementary material for: Optimization of physicochemical properties of theophylline by forming cocrystals with amino acids
Source: Royal Society of Chemistry journal article supplement (doi:10.1039/d4ra06804a), 2024-01-01
Supplement: d4ra06804a1.pdf [file d4ra06804a1.pdf]

## Supporting Information

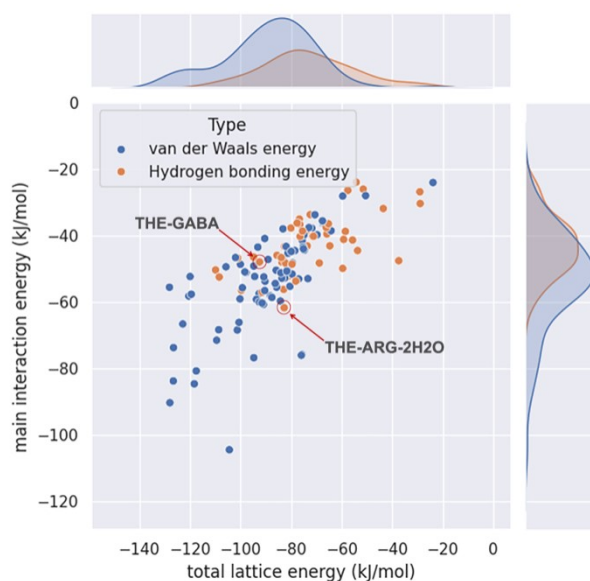

**Figure S1.** Energy distribution of theophylline cocrystals in CSD database and two new cocrystals of theophylline with amino acids

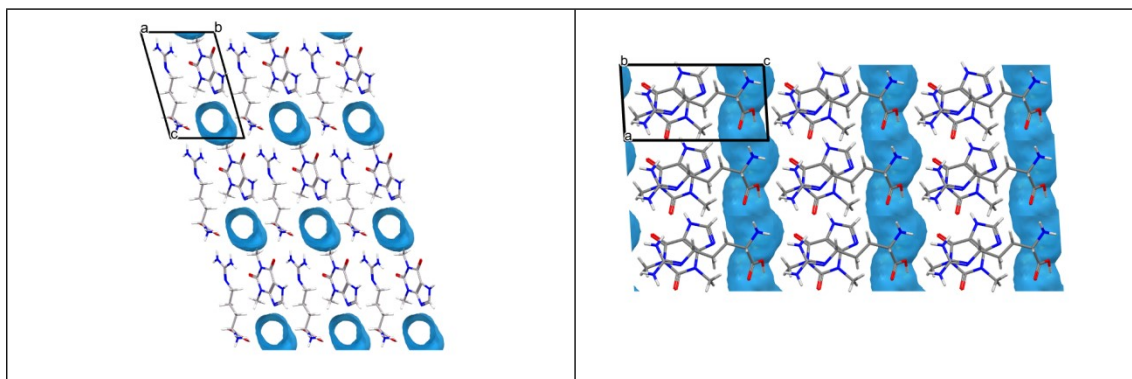

**Figure S2.** Water space in  $3 \times 3$  packing structure of THE-ARG-2H<sub>2</sub>O from a-axis(left) and b-axis(right).

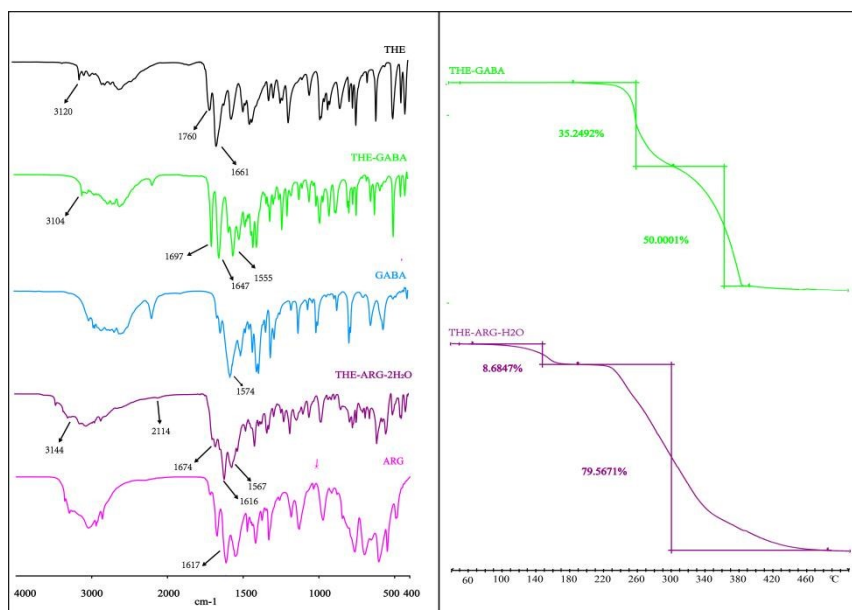

**Figure S3.** IR (left) and TGA (right) profiles of API, CCFs, and the corresponding cocrystals.

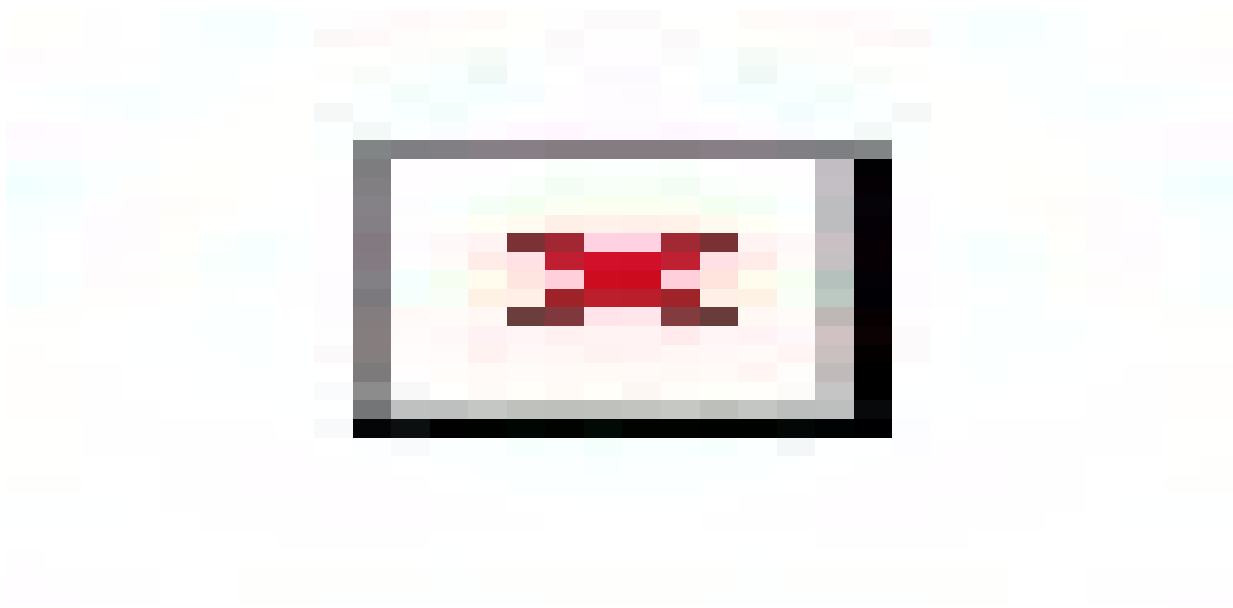

**Figure S4.** DVS of THE, GABA, ARG, THE-GABA, and THE-ARG-2H<sub>2</sub>O.

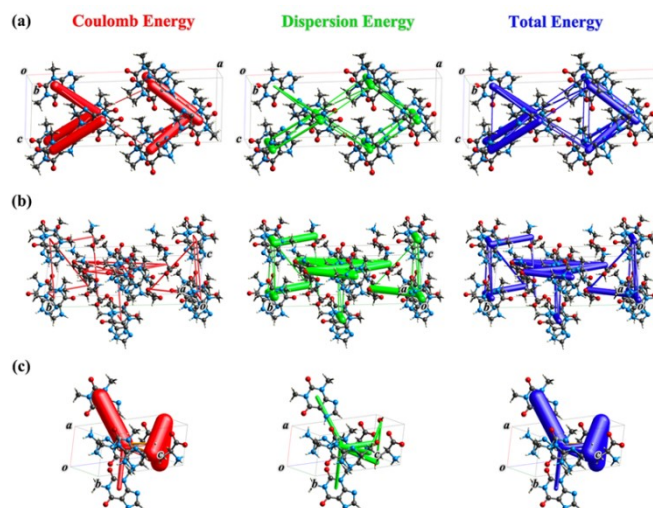

**Figure S5.** Energy frameworks of THE (a), THE-GABA (b), and THE-ARG-2H<sub>2</sub>O (c).

**Table S1.** Parameters (Å, Degree) of the Main Hydrogen Bonds for the Cocrystals.

| Cocrystal         | D-H...A                                              | D...A(Å) | D-H...A(°) | D-H...A                                              | D...A(Å) | D-H...A(°) |
|-------------------|------------------------------------------------------|----------|------------|------------------------------------------------------|----------|------------|
| THE-GABA          | N <sub>4</sub> -H <sub>4</sub> ...O <sub>15</sub>    | 2.68     | 163.78     | N <sub>15</sub> -H <sub>15B</sub> ...O <sub>25</sub> | 2.76     | 165.41     |
|                   | N <sub>15</sub> -H <sub>15A</sub> ...O <sub>25</sub> | 2.84     | 168.29     | N <sub>15</sub> -H <sub>15C</sub> ...N <sub>3</sub>  | 3.09     | 169.67     |
| THE-ARG-          | O <sub>1W</sub> <sup>-</sup>                         | 2.80     | 173.00     | N <sub>45</sub> -H <sub>45B</sub> ...O <sub>15</sub> | 2.81     | 161.71     |
| 2H <sub>2</sub> O | H <sub>1WA</sub> ...O <sub>15</sub>                  |          |            |                                                      |          |            |
|                   | N <sub>15</sub> -H <sub>15A</sub> ...O <sub>25</sub> | 2.78     | 177.17     | O <sub>1W</sub> <sup>-</sup>                         | 2.80     | 167.15     |
|                   |                                                      |          |            | H <sub>1WB</sub> ...N <sub>3</sub>                   |          |            |
|                   | N <sub>15</sub> -H <sub>15B</sub> ...O <sub>2W</sub> | 2.86     | 167.42     | N <sub>15</sub> -H <sub>15C</sub> ...O <sub>2</sub>  | 2.87     | 169.48     |
|                   | N <sub>35</sub> -H <sub>35A</sub> ...O <sub>1</sub>  | 2.86     | 161.77     |                                                      |          |            |

**Table S2.** The cocrystals of THE involved in Figure S1.

| NO. | Cocrystals                                   | Code   | NO. | Cocrystals                                             | Code     |
|-----|----------------------------------------------|--------|-----|--------------------------------------------------------|----------|
| 1   | Theophylline-Isonicotinamide                 | EVEYAH | 55  | Theophylline-rac-dihydromyricetin acetonitrile solvate | NEXSIW   |
| 2   | Theophylline-tegafur monohydrate             | DOXFIH | 56  | Theophylline- 9-(2-methoxyphenyl)-9H-xanthen-9-ol      | NIJJIB   |
| 3   | Theophylline-urea                            | DUXZAX | 57  | Theophylline- L-tartaric acid                          | NUJCAJ   |
| 4   | Theophylline-methyl gallate                  | GAFTUE | 58  | Theophylline-DL-tartaric acid                          | NUJCEC   |
| 5   | Theophylline-nicosamide                      | HEBFEB | 59  | Theophylline-diclofenac                                | OPOFUW   |
| 6   | Theophylline-nicosamide acetonitrile solvate | HEBFIF | 60  | Theophylline-difunisal                                 | OPOGAD   |
| 7   | Theophylline-Glibenclamide                   | GEKMUH | 61  | Theophylline-2,3,5-trifluorobenzoic acid               | OPUKIV   |
| 8   | Theophylline-Lamotrigine                     | FISNIH | 62  | Theophylline-2,3,6-trifluorobenzoic acid               | OPUKOB   |
| 9   | Theophylline-gentisic acid                   | DUCROJ | 63  | Theophylline-2,4,5-trifluorobenzoic acid               | OPUKUH   |
| 10  | Theophylline-aspirin                         | DIPJAJ | 64  | Theophylline-2,4,5-trifluorobenzoic acid               | OPUKUH01 |

|    |                                                         |          |    |                                                         |          |
|----|---------------------------------------------------------|----------|----|---------------------------------------------------------|----------|
| 11 | Theophylline-pyridine-2,6-diamine                       | DEDMEH   | 65 | Theophylline-2,4,6-trifluorobenzoic acid                | OPULES   |
| 12 | Theophylline-N,N'-ethane-1,2-diylidiformamide           | DUWXAW   | 66 | Theophylline-2,4,6-trifluorobenzoic acid                | OPULES01 |
| 13 | Theophylline-Sulfacetamide                              | HOCCUZ   | 67 | Theophylline-pentafluorobenzoic acid                    | OPUMAP   |
| 14 | Theophylline-4-aminobenzoic acid                        | HUMNEK01 | 68 | Theophylline-pentafluorobenzoic acid                    | OPUMAP01 |
| 15 | Theophylline-pterostilbene dichloromethane solvate      | HURPOC   | 69 | Theophylline-2,3,4-trifluorobenzoic acid                | OPUMIX   |
| 16 | Theophylline-3-hydroxybenzoic acid                      | DOPMUS   | 70 | Theophylline-3-fluorobenzoic acid                       | OPUMOD   |
| 17 | Theophylline- DL-malic acid                             | DOPMUS   | 71 | Theophylline-3,5-difluorobenzoic acid                   | OPUMUJ   |
| 18 | Theophylline- D-malic acid                              | CIZTAH   | 72 | Theophylline-2-fluorobenzoic acid                       | OPUNAQ   |
| 19 | Theophylline-5-Chlorosalicylic acid                     | CODCOO   | 73 | Theophylline-2-fluorobenzoic acid nitromethane solvate  | OPUNOE   |
| 20 | Theophylline-2,4-dihydroxybenzoic acid monohydrate      | CSATEO   | 74 | Theophylline-2,3,4,6-tetrafluorobenzoic acid            | OPUPIA   |
| 21 | Theophylline-2,3-dihydroxybenzoic acid                  | DOPNAZ   | 75 | Theophylline-3,4-difluorobenzoic acid                   | OPUPOG   |
| 22 | Theophylline-2,4-dihydroxybenzoic acid                  | DOPNED   | 76 | Theophylline-2,3,4,6-tetrafluorobenzoic acid            | OPUPUM   |
| 23 | Theophylline-p-coumaric aci                             | IJIBEJ   | 77 | Theophylline-dihydromyricetin acetonitrile solvate      | OQFIUR   |
| 24 | Theophylline-p-coumaric aci                             | IJIBEJ01 | 78 | Theophylline-pyrrolidin-2-one                           | PICMIA   |
| 25 | Theophylline-benzamide                                  | RABXIE01 | 79 | Theophylline-pyrrolidin-2-one                           | PICMOG   |
| 26 | Theophylline-rucaparib monohydrate                      | JIBMAM   | 80 | Theophylline-benzamide                                  | RABXIE   |
| 27 | Theophylline-baicalein trihydrate                       | KAMQIB   | 81 | Theophylline-benzamide                                  | RABXIE02 |
| 28 | Theophylline-Pyrimethamine                              | KICWIE   | 82 | Theophylline-pyrazinamide                               | RACFIN   |
| 29 | Theophylline-citric acid                                | KIGKAN   | 83 | Theophylline-pyrazinamide                               | RACFIN01 |
| 30 | Theophylline-salicylic acid                             | KIGLES   | 84 | Theophylline-3-hydroxysalicylaldoxime dihydrate         | RUYXUG   |
| 31 | Theophylline-4-hydroxybenzoic acid                      | KIGLOC   | 85 | Theophylline-belinostat                                 | SIBZAI   |
| 32 | Theophylline-paracetamol                                | KIGLUI   | 86 | Theophylline-phenobarbital                              | THOPBA   |
| 33 | Theophylline-3-(Dihydroxyboryl)benzoic acid             | LEDVOH   | 87 | Theophylline-p-nitrophenol                              | TOPPNP   |
| 35 | Theophylline-phthalic acid                              | LUKXUL   | 88 | Theophylline-3,5-dinitrobenzoic acid                    | UKEXOA   |
| 36 | Theophylline-Caffeine                                   | NEHJER   | 89 | Theophylline-(4-chlorophenyl)boronic acid               | ULUQUP   |
| 37 | Theophylline-(pyridine-2,6-dicarboxylic acid) dihydrate | UNITIV   | 90 | Theophylline-(4-iodophenyl)boronic acid                 | ULURAW   |
| 38 | Theophylline-benzoic acid                               | VAXSAQ   | 91 | Theophylline-(4-hydroxyphenyl)boronic acid              | ULUREA   |
| 39 | Theophylline-1,10-phenanthroline dihydrate              | WAKJIF   | 92 | Theophylline-1,4-phenylenediboronic acid hemihydrate    | ULURIE   |
| 40 | Theophylline-orcinol dihydrate                          | WOCHAZ   | 93 | Theophylline-pyrazole-3,5-dicarboxylic acid monohydrate | UNITER   |

|    |                                               |          |     |                                                               |          |
|----|-----------------------------------------------|----------|-----|---------------------------------------------------------------|----------|
| 41 | Theophylline- 3,4-dihydroxybenzoic acid       | WOCHON   | 94  | Theophylline-resorcinol monohydrate                           | WOCGOM   |
| 42 | Theophylline-anthranilic acid                 | WUTHEA   | 95  | Theophylline-phluroglucinol monohydrate                       | WOCGUS   |
| 43 | Theophylline-2-aminobenzoic acid tetrahydrate | WUTHOK   | 96  | Theophylline-3,5-dihydroxybenzoic acid                        | WOCHIH   |
| 44 | Theophylline-2-aminobenzoic acid tetrahydrate | WUTHUQ   | 97  | Theophylline-cinnamic acid                                    | WOCHUT   |
| 45 | Theophylline-oxalic acid                      | XEJWUF   | 98  | Theophylline-2-aminobenzoic acid isobutanol solvate           | WUTHIE   |
| 46 | Theophylline-malonic acid                     | XEJXAM   | 99  | Theophylline-3-aminobenzoic acid                              | WUTJAY   |
| 47 | Theophylline-malonic acid                     | XEJXAM01 | 100 | Theophylline-maleic acid                                      | XEJXEQ   |
| 48 | Theophylline-entacapone                       | XIPNOC   | 101 | Theophylline-glutaric acid                                    | XEJXIU   |
| 49 | Theophylline-4-hydroxybenzamide               | YEVMIY   | 102 | Theophylline-saccharin                                        | XOBCUN   |
| 50 | Theophylline-3,4-dichlorobenzoic acid         | YEVNAR   | 103 | Theophylline-acetazolamide                                    | YEVMIK   |
| 51 | Theophylline-4-chloro-3-nitrobenzoic acid     | YEVNIZ   | 104 | Theophylline-picolinamide                                     | YEVNEV   |
| 52 | Theophylline-5-fluorouracil monohydrate       | ZAYLOA   | 105 | Theophylline-4-aminosalicylic acid                            | YUJLOG   |
| 53 | Theophylline-p-nitroaniline                   | ZEXTIF   | 106 | Theophylline-4-fluoro-3-nitrobenzoic acid                     | ZEKPIR01 |
| 54 | Theophylline-Vanillic acid                    | ZOYBIA   | 107 | Theophylline-2-((3-(trifluoromethyl)phenyl)amino)benzoic acid | ZIQDUA   |

**Table S3.** Main Vibrational Data ( $\text{cm}^{-1}$ ) with Tentative Assignments for cocrystals

| Vibrational data |          |                           |      |      | Vibrational assignment          |
|------------------|----------|---------------------------|------|------|---------------------------------|
| THE              | THE-GABA | THE-ARG-2H <sub>2</sub> O | GABA | ARG  |                                 |
| ----             | ----     | 2114                      | ---- | ---- | H <sub>2</sub> O                |
| 3120             | 3104     | 3144                      | ---- | ---- | Secondary amine                 |
| 1706             | 1697     | 1674                      | ---- | ---- | Carbonyl group<br>(amide group) |
| 1659             | 1647     | 1567                      | ---- | ---- | Imine group                     |
| ----             | 1555     | 1616                      | 1574 | 1614 | Carbonyl (carboxyl)             |
